# Supplementary material for: ZnO nanostructures directly grown on paper and bacterial cellulose substrates without any surface modification layer
Source: Royal Society of Chemistry journal article supplement (doi:10.1039/c3cc43152e), 2013-01-01
Supplement: c3cc43152e.pdf [file c3cc43152e.pdf]

## Supporting Information

ZnO grown on photographic paper.

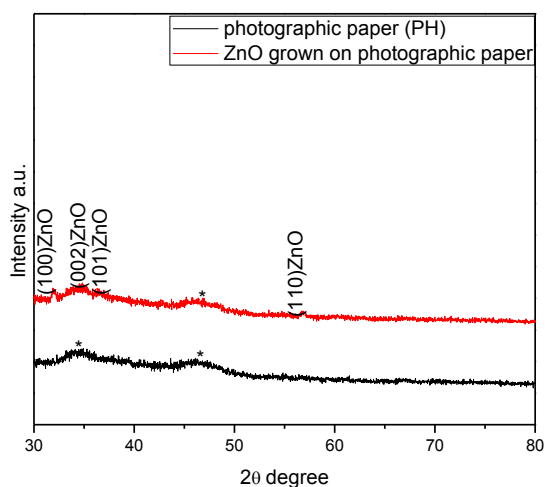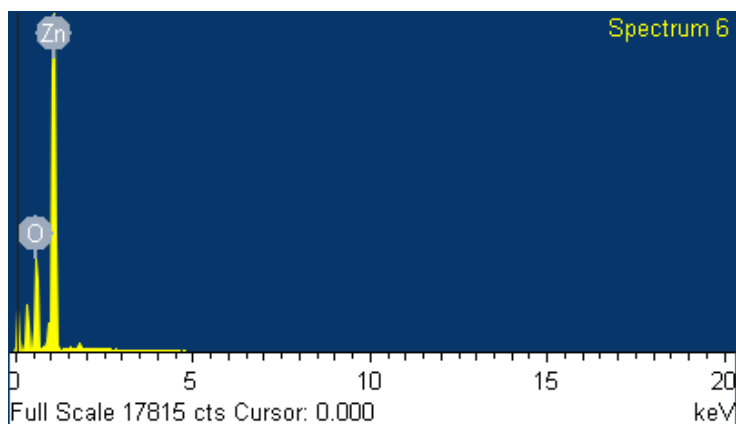

ZnO grown on chromatographic paper.

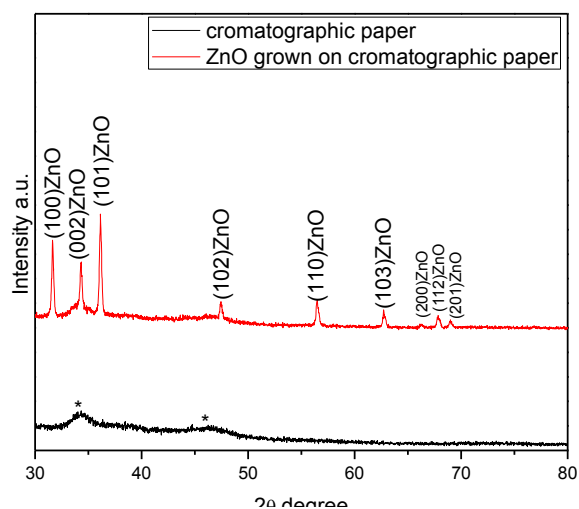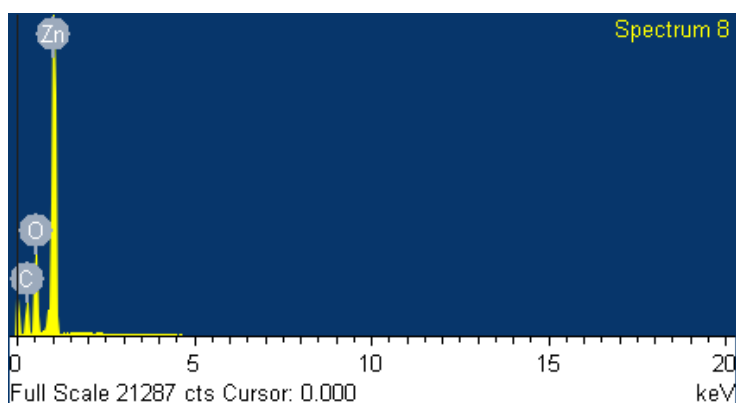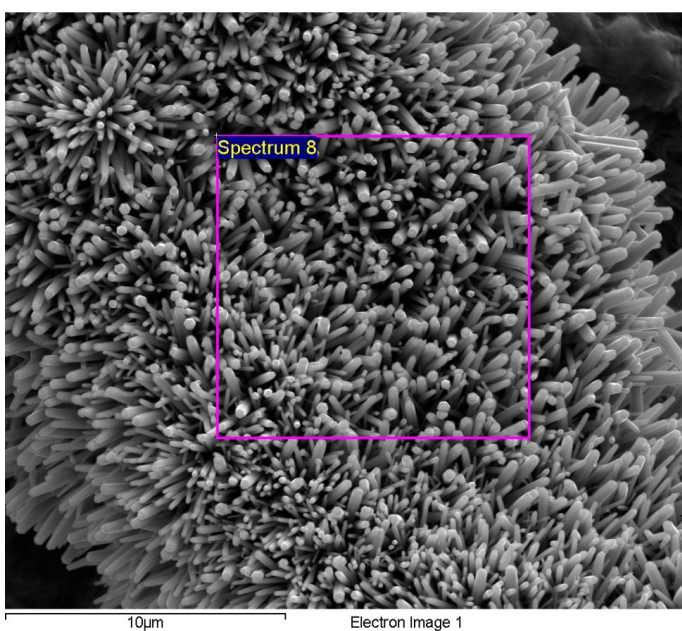

EDS- Spectrum 8 – approximate  
weight percentage - 18, 81% oxygen  
and 81,19% zinc

ZnO grown on bacterial cellulose.

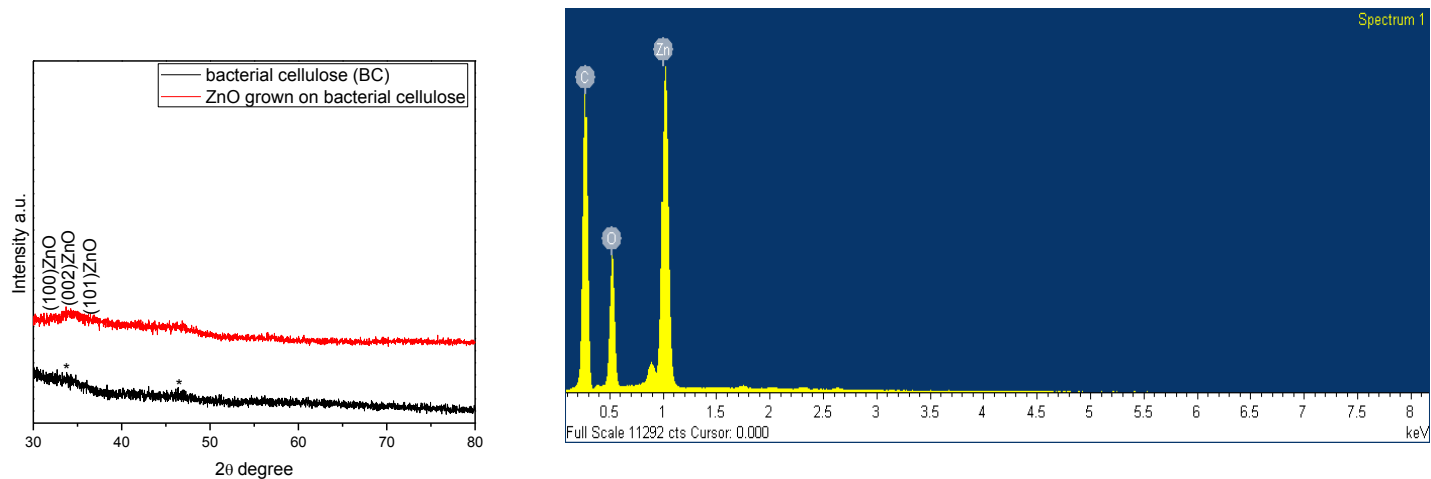

Table 1: Root mean square roughness (RMS) values in different surface areas

| Photographic paper - PP | Chromatographic paper - CP | Bacterial cellulose - BC |
|-------------------------|----------------------------|--------------------------|
| Area 50x50 μm           |                            |                          |
| 1.556 μm                | >5μm                       | 0.381 μm                 |
| Area 3x3μm              |                            |                          |
| 0.538 μm                | 80.1 nm                    | 0.445 μm                 |

Table 2: Root mean square roughness (RMS) values for the substrates, before and after seed layer deposition

| Substrate | Before | After  |
|-----------|--------|--------|
| PP        | 538nm  | 1507nm |
| CP        | 80.1nm | 241nm  |
| BC        | 445nm  | 153nm  |

Table 3: Concentration of Zn<sup>2+</sup> just after deposition of the seed layer solution, obtained through EDX analysis.

| Substrate |        | Standard deviation |
|-----------|--------|--------------------|
| PP        | ~1.2%  | 0.50               |
| CP        | ~0.21% | 0.07               |
| BC        | ~1.12% | 0.91               |

AFM images were also obtained ( $3 \times 3 \mu\text{m}$ ) just after the deposition of the seed layer solution to verify the swelling of the substrates. The RMS values for the substrates are shown in the ESI<sup>†</sup> (Table S2). The roughness of the CP substrate slightly increased (from 80 to 241 nm), suggesting that the fast deposition of the seed layer does not have a strong impact on the swelling of this substrate. In contrast, for the PP substrate, the RMS value increased to a great extent (from 0.538 to 1.507  $\mu\text{m}$ ), probably because of the swelling of the voids/cracks, turning the paper rougher. Comparing the three substrates, this paper is the less homogeneous one.

Interestingly, the water uptake by the BC substrate led to a smoother surface, as the RMS value decreased from 0.445 to 0.153  $\mu\text{m}$ . For this substrate, well known for its water holding capacity, contrary to plant cellulose, water uptake was beneficial in terms of its roughness.
